# Supplementary material for: Photoautotrophic organisms control microbial abundance, diversity, and physiology in different types of biological soil crusts
Source: PubMed Central journal article supplement — ISME J. 2018 Feb 14;12(4):1032–46. doi: 10.1038/s41396-018-0062-8 (PMC5864206; doi:10.1038/s41396-018-0062-8), 2018-02-14
Supplement: 41396_2018_62_MOESM1_ESM.pdf [file 41396_2018_62_MOESM1_ESM.pdf]

## Supplementary Material

**Titel:** Photoautotrophic organisms control microbial abundance, diversity, and physiology in different types of biological soil crusts

**Authors:** Stefanie Maier<sup>1\*</sup>, Alexandra Tamm<sup>1\*</sup>, Dianming Wu<sup>1,2</sup>, Jennifer Caesar<sup>3</sup>, Martin Grube<sup>4</sup>, Bettina Weber<sup>1</sup>

<sup>1</sup>Max Planck Institute for Chemistry, Multiphase Chemistry Department, Mainz, Germany

<sup>2</sup>Key Laboratory of Geographic Information Sciences, Ministry of Education, School of Geographic Sciences, East China Normal University, Shanghai, China

<sup>3</sup>University of Applied Sciences, Department of Agriculture & Food Sciences, Neubrandenburg, Germany

<sup>4</sup>University of Graz, Institute of Plant Sciences, Graz, Austria

\*These authors contributed equally to this work.

### Correspondence:

Stefanie Maier, Max Planck Institute for Chemistry, Multiphase Chemistry, Hahn-Meitner-Weg 1, 55128 Mainz, Germany, ++49(0)6131-305-7004, E-mail: [s.maier@mpic.de](mailto:s.maier@mpic.de)

Bettina Weber, Max Planck Institute for Chemistry, Multiphase Chemistry, Hahn-Meitner-Weg 1, 55128 Mainz, Germany, ++49(0)6131-305-7501, E-mail: [b.weber@mpic.de](mailto:b.weber@mpic.de)

### Supplementary Methods

#### Sampling area

All samples were collected in the vicinity of the village Soebatsfontein next to the BIOTA observatory No. 22 (<http://www.biota-africa.org>, 30.1865°S, 17.5434°E, 392 m a.s.l.), which is situated approximately 60 km south of Springbok, Northern Cape Province, South Africa. The sampling area is located within the Succulent Karoo biome, which is known for its unique flora of succulent plants and very high plant diversity (Van Jaarsveld, 1987). At our study site, the dominant soil types are Leptosol, Durisol and Cambisol, where the texture of the soil ranges from sandy to silty loam, representing pure sands in the topsoils (Haarmeyer *et al.*, 2010).

The Succulent Karoo is characterized by a semi-arid climate, where most of the precipitation occurs during the winter months (July and August) and the annual precipitation averages about 131 mm. The annual mean air temperature is 19.4°C (Average values from

2001-2009; Haarmeyer *et al.*, 2010), varying between maximum values of 44°C being reached in February and 2°C occurring in July (<http://www.biota-africa.org>).

Biocrusts in the area regularly cover the interspaces between plants as well as underneath shrubs. Whereas cyanobacteria- and lichen-dominated biocrusts occur both in interspaces and beneath vegetation, moss-dominated crusts are mainly restricted to the shaded areas beneath shrubs (Dojani *et al.*, 2011; Weber *et al.*, 2012).

### Sampling and storage

Moss-dominated biocrusts contained the species *Ceratodon purpureus* (Hedw.) Brid as dominating photobiont (Weber *et al.*, 2012) (Figure 1D, H). The genus *Ceratodon* is known to occur in hot arid regions throughout the world, as the western US drylands (Rosentreter *et al.*, 2007) and the semi-deserts of Australia (Eldridge and Tozer, 1997). In lichen-dominated biocrusts the chlorolichen *Psora decipiens* (Hedwig) Hoffm. was dominating (Figure 1C, G). The lichen *Psora decipiens* is found in soil crusts in North America, Mexico, Africa, around the Mediterranean Sea, in Europe, throughout the Middle East, in India, in many areas of Asia, in Australia, New Zealand, and even in the high Arctic and the nival belt of the Alps (Belnap *et al.*, 2003). Cyanobacteria-dominated biocrusts mainly comprised cyanobacteria, with genera such as *Chroococcidiopsis*, *Pseudoanabaena*, *Phormidium*, *Leptolyngbya*, *Microcoleus*, and *Nostoc*, but also lichens of the species *Collema coccophorum* Tuck. with cyanobacteria as photobionts were sometimes present (Büdel *et al.*, 2009) (Figure 1B, F). The moss and lichen taxa have previously been identified based on morphological parameters (Büdel *et al.*, 2009; Weber *et al.*, 2012), whereas the dominating cyanobacteria have been identified by means of both morphological and genetic identification techniques (biphasic approach; Büdel *et al.*, 2009; Dojani *et al.*, 2014).

Biocrust and bare soil samples (Figure 1A, E) for physiological experiments and pH-measurements were collected in petri dishes (5.5 cm diameter) in October 2008 and October 2009 (moss-dominated biocrusts) and October 2010 (cyanobacteria- and green-algal lichen-dominated biocrusts). The samples for CO<sub>2</sub> gas exchange measurements were collected in petri dishes (5.5 cm diameter) in October 2008 and October 2009 (moss-dominated biocrusts) and October 2010 (cyanobacteria- and green-algal lichen-dominated biocrusts). During sampling, the base of a petri dish (lined with some pieces of soft cellulose tissue) was pressed about one centimeter deep into the soil before the sample could be carefully removed with the help of a trowel. After drying under ambient dry conditions, the samples were closed and sealed with Parafilm (Brand GmbH, Wertheim, Germany) and transported to Germany. Until measurements at the University of Kaiserslautern in winter 2010/2011 (moss-dominated crusts), winter 2011/2012 (green-algal lichen-dominated crusts) and in spring 2013 (cyanobacterial lichen-dominated crusts) the samples were stored in a freezer at -20°C.

In previous measurements, it had been shown that dry biocrusts could outlast under these conditions without harm (Weber *et al.*, 2012). The different biocrust and bare soil samples for the NO<sub>x</sub>- and HONO- measurements were collected in November 2013 in stainless steel cylinders (5.0 cm diameter, 2.6 cm high; Eijkelkamp Agrisearch Equipment, Netherlands) as described in (Weber *et al.*, 2015). To avoid cracking of the biocrust surface, the latter was covered with a piece of cloth and cautiously watered. After that the steel cylinders were put on the biocrust surface, covered with a wooden board and, using a hammer, the cylinders were driven into the soil. The samples were removed from the ground similarly to those collected for the gas exchange measurements. To minimize metabolic activity, the samples were air-dried in the camp, then closed with special plastic lids and transported to the Max Planck Institute for Chemistry in Mainz. Until analysis they were stored in the fridge at 5°C.

For DNA extraction, seven replicates of the three types of biocrusts and seven bare soil samples without a visible crust were sampled in October 2013. The soil samples were collected using sterile equipment and stored in petri dishes (5.5 cm diameter). After collection, the samples were immediately placed in a portable freezer and kept at -20°C during the trip to the University of Cape Town, where they were stored at -80°C until processing in the laboratory.

### **Quantitative PCR analyses to estimate bacterial and fungal small-subunit rRNA gene abundances**

DNA standards were produced from *Escherichia coli* (DSM 1116) 16S rRNA gene and the *Saccharomyces cerevisiae* (ATCC 9763) 18S rRNA gene. The amplified products were run on a 1% 1xTAE agarose gel to confirm specificity of the amplification and were cloned using the pGEM<sup>®</sup>-T Easy Vector System kit (Promega, Madison, WI, USA). Plasmids were isolated using the illustra plasmidPrep Mini Spin kit (GE Healthcare, Buckinghamshire, UK). Plasmid DNA was linearized by digestion with PstI (New England BioLabs, Frankfurt am Main, Germany) at 37°C for 2 h followed by enzyme inactivation at 80°C for 20 min. Standard curves were generated using 10-fold serial dilution of the plasmid containing a full-length copy of *Escherichia coli* 16S rRNA gene or the *Saccharomyces cerevisiae* 18S rRNA gene. Target genes were amplified using KAPA SYBR<sup>®</sup> FAST qPCR Kit Master Mix Universal (Kapa Biosystems Ltd., London, UK). The qPCR reactions contained 5 µl 2x KAPA SYBR<sup>®</sup> FAST qPCR Master Mix Universal, 0.2 µl of each 10 µM forward and reverse primers, 0.2 µl 50x ROX Low and 1.4 µl PCR-grade water. Standard and environmental DNA samples were added at 3.0 µl per reaction. The reaction was carried out on an Applied Biosystems<sup>®</sup> 7500 instrument (Applied Biosystems, California, USA) using a program of 95°C for 3 min followed by 40 cycles of 95°C for 3 s, 51°C for 20 s and 72°C for 32 s (bacteria). For the 18S gene essays, thermal cycling conditions were as follows: one cycle of 95°C for 3 min; 40 cycles of

95°C for 3 s, 50°C for 20 s, 72°C for 32 s. For fungi, the primer used were FR1 (5'-AICCATTC AATCGGTAIT- 3') and FF390 (5'- CGATAACGAACGAGACCT – 3'), while 338f (5'- ACTCCTACGGGAGGCAGCAG – 3') and 518r (5'- ATTACCGCGGCTGCTGG) were used for bacteria. The specificity of the amplification was verified by a melting curve analysis after each qPCR run as well as with agarose gel electrophoresis. Gene copy numbers were calculated using a regression equation relating the cycle threshold value to the known number of copies in the standards. All qPCR reactions were run in duplicate.

### **16S rRNA gene PCR amplification and sequencing**

16S rRNA gene amplification and sequencing on an Illumina MiSeq platform to assess bacterial community structure, 16S sequence based amplicon generation, purification and indexing as well as sequencing of amplicon libraries on a MiSeq (Illumina, Eindhoven, Netherlands) with v3 600 cycles chemistry was performed as described in Kozich *et al.* (2013). Briefly, 25 ng of genomic DNA were used in a 25 µl PCR reaction performed in triplicates. For amplification, HPLC purified primers (Eurofins MWG, Ebersberg, Germany) targeting the hypervariable region V4 from Bacteria and Archaea (F515 – 5'GTGCCAGCMGCCGCGGTAA 3', R806 – 5'GGACTACHVGGGTWTCTAAT 3') were used (Bates *et al.*, 2011). A PCR mix of 25 µl was prepared in triplicates containing 1 x Fast Start High Fidelity Buffer (Roche Diagnostics, Mannheim, Germany), 1.25 U High Fidelity Enzyme (Roche Diagnostics, Mannheim, Germany), 200 µM dNTPs (Roche Diagnostics, Mannheim, Germany), 0.4 µM primers and PCR-grade water (Roche Diagnostics, Mannheim, Germany). A no-template control was included. Thermal cycling conditions were for initial denaturation at 95°C for 3 min followed by 30 cycles of denaturation at 95°C for 45 s, annealing at 55°C for 45 s and extension at 72°C for 1 min with a final extension of 7 min at 72°C. PCR products were checked on an agarose gel, the triplicates were pooled and normalized with a SequelPrep Normalization Plate (Life Technologies) according to suppliers instructions. 15 µl of normalized PCR product were used for Indexing PCR according to Kozich *et al.* (2013). 5 µl of each sample were pooled to a final library that was purified by standard procedures, quantified by Picro Green (Life Technolgies) and diluted to 4 nM to run on a MiSeq. Version 3 600 cycle chemistry (Illumina, Eindhoven, Netherlands) was used according to manufacturer's instructions to run the 6 pM library with 10% PhiX.

### **Processing of Illumina amplicon sequence data**

Library adapter trimmed overlapping paired-end read data from the Illumina platform were merged using the software FLASH (Fast Length Adjustment of Short reads) (Magoč and Salzberg, 2011). Sequence data, 2 971 627 reads from 28 samples, were pre-processed

using the Quantitative Insights into Microbial Ecology (QIIME) pipeline v. 1.8.0. (Caporaso *et al.*, 2011). Briefly, for quality-filtering of the high-throughput sequencing data default settings in QIIME were used, yielding 2 608 992 sequence reads (min average quality score allowed: 25). An open-reference operational taxonomic unit (OTU) picking protocol on the demultiplexed Illumina data was used, where usearch61 (Edgar, 2010) was applied to compare sequences to an OTUs reference data set (Greengenes v. 13\_8) and any reads which did not match a reference sequence at greater or equal to 97 % sequence identity were subsequently clustered de novo. For performing sequence alignment PyNAST was chosen (Caporaso *et al.*, 2010). The method for inferring the phylogenetic tree was FastTree (Price *et al.*, 2009). For downstream analyses chloroplast and mitochondria sequences as well as OTUs present in control reactions (negative extraction control and no-template PCR control) were excluded, leaving 2 454 673 sequences. Furthermore, samples were rarefied to 48 009 sequences per sample except when we performed tests for detecting taxa that are differentially abundant across habitats using DESeq2 package (Love *et al.*, 2014).

Several metrics were used to estimate within-sample diversity (alpha diversity), including Shannon index, which measures both richness and evenness, and Faith's phylogenetic diversity (Faith, 1992). Non-Metric Multidimensional Scaling was performed on Bray-Curtis dissimilarity and phylogenetic metrics, weighted and unweighted UniFrac distances, to determine the influence of microhabitat using the R phyloseq package (McMurdie and Holmes, 2013; R Core Team, 2013). UniFrac allows the comparison of microbial communities using phylogenetic information. The weighted version takes into account differences in relative abundances (Lozupone and Knight 2005; Lozupone *et al.* 2011). The function envfit from the R vegan package was used to relate patterns in bacterial communities with environmental parameters (Oksanen *et al.*, 2015). For the comparison of the samples between the four microhabitats we applied a taxa composition data analysis approach at the phylum level introduced by La Rosa *et al.* (2012). The shared taxa (core members) across biocrust types were identified using a two-parameter model and visualized with a ubiquity vs. abundance plot (taxonomic ubiquity cut-off = 0.8, abundance = 0.01). The term "abundance" is defined as the proportion of a taxon of interest in a sample and "ubiquity" describes the proportion of samples where a taxon is detected (Li *et al.*, 2013). We identified the 'niche breadth' using the formula

$$B_j = \frac{1}{\sum_{i=1}^N P_{ij}^2}$$

where  $B_j$  indicates niche breadth and  $P_{ij}$  is the proportion of individuals belonging to species  $j$  present in a given habitat  $i$ . OTUs that were more evenly distributed along a wider range of habitats were considered as habitat generalists, whereas OTUs with a lower  $B$ -value were regarded as habitat specialists. Niche breadth was calculated for the 500 OTUs with highest mean relative abundance. The values for niche breadth ranged from 1 to 3.96. OTUs with  $B$

> 3.5 were regarded as generalists, OTUs with  $B < 1.5$  were considered as specialists (Levins, 1968; Logares *et al.*, 2012).

### **Fungal ribosomal internal transcribed spacer (ITS) amplification and pyrosequencing**

We used FLX 454 one way read (Lib-L kit, Primer A, Primer B, Roche 454 Life Science, Branford, CT, USA) fusion primers (Table S1). The template specific sequence was ITS1F (5'- CTTGGTCATTTAGAGGAAGTAA – 3') and ITS2R (5'- GCTGCGTTCTTCATCGATGC – 3') targeting the ITS1 region. For amplification a 25  $\mu$ l PCR master mix containing 1 x Fast Start High Fidelity Buffer (Roche Diagnostics, Mannheim, Germany), 1.25 U High Fidelity Enzyme (Roche Diagnostics, Mannheim, Germany), 200  $\mu$ M dNTPs (Roche Diagnostics, Mannheim, Germany), 0.4  $\mu$ M barcoded primers (Eurofins MWG, Ebersberg, Germany), PCR-grade water (Roche Diagnostics, Mannheim, Germany) and 20 ng total genomic DNA was prepared in triplicates. Denaturation of double stranded DNA was performed at 95°C for 3 min followed by 32 cycles of denaturation at 95°C for 45 s, annealing at 50°C for 45 s, extension at 72°C for 1 min and a final extension of 7 min at 72°C. Amplicons were loaded to a 1% agarose gel and purified with a QIAquick Gel Extraction Kit (Qiagen, Hilden, Germany). Determination of dsDNA concentration after amplicon purification was performed using the Quant-iT™ PicoGreen® dsDNA Assay Kit (Life Technologies, CA, USA) according to manufacturer's instructions. After quantification, 30 barcode labeled amplicons were pooled equimolar, again size selected by gel purification, and analyzed on a 2100 Bio Analyzer (Agilent Technologies, Waldbronn, Germany) using a DNA 7500 kit. With the pooled samples emulsion PCR was performed using the GS Titanium MV emPCR Kit and method (Lib-L) (Roche 454 Life Science, Branford, CT, USA) according to manufacturers' instructions. Sequencing of an equimolar pool of 30 samples on a 1/4 PTP was performed using the GS FLX Titanium Sequencing Kit XLR70 (Roche 454 Life Science, Branford, CT, USA) according to manufacturer's instructions.

Raw sequence data were processed using the Quantitative Insights into Microbial Ecology (QIIME) pipeline v. 1.8.0. (Caporaso *et al.*, 2011). Fungal ITS amplicon data were analyzed using the QIIME/UNITE reference OTUs according to the Fungal ITS QIIME analysis tutorial. A quality control of the reads and denoising was performed to reduce the amount of sequencing errors, characteristic for pyrosequencing technology employed by 454 sequencing machines. Each 454 run was preprocessed with the QIIME script `split_libraries.py`, to assign barcodes to samples and filter low quality reads (min average quality score allowed: 25). Denoising was performed with `denoise_wrapper`. Another cleanup step performed was to detect and remove chimeras using USEARCH (`usearch61 v6.1.544`). The fungal ITS1 region was extracted using ITSx (Bengtsson-Palme *et al.*, 2013). An open-reference operational taxonomic unit (OTU) picking approach was used to compare

sequences to an OTUs reference data set (UNITE fungal database QIIME release v. 12\_11; reference database called: 97\_otus.fasta and taxonomy database called 97\_otu\_taxonomy.txt) and any reads which did not match a reference sequence at greater or equal to 97 % sequence identity were subsequently clustered de novo. Non-Metric Multidimensional Scaling was performed on Bray-Curtis dissimilarity using the R phyloseq package (McMurdie and Holmes, 2013; R Core Team, 2013). The function envfit from the R vegan package was used to relate patterns in fungal communities with environmental parameters (Oksanen *et al.* 2015; R Core Team, 2013). The R DESeq2 package was used to detect taxa that are differentially abundant across habitats (Love *et al.*, 2014).

### **Biomass and soil parameters**

Chlorophyll was extracted according to the method established by Ronen and Galun (1984) using DMSO (Dimethylsulfoxide) with a spatula tip of CaCO<sub>3</sub> to avoid acidification and concomitant phaeophytinization of chlorophyll. After spectrophotometry, the chlorophyll<sub>a</sub> (Chl<sub>a</sub>) content was calculated according to Arnon *et al.* (1974), whereas chlorophyll<sub>a+b</sub> (Chl<sub>a+b</sub>) was determined according to Lange (pers. comm.), as described in Weber *et al.* (2013). A detailed description of the chlorophyll determination can be found in the Supplementary Methods.

For determination of the total nitrogen and carbon content, thirteen samples of each biocrust type and of bare soil were dried for 1h at 105°C and subsequently fine ground and homogenized using an agate mortar. The CHN analysis (Elementar Vario Micro Cube, 2016 Elementar Analysensysteme GmbH, Hanau, Germany) was conducted at the Department of Chemistry, division Chemical Analytics, of the University of Kaiserslautern. PH values of each biocrust type and bare soil (n = 4) were analyzed electrometrically (Streubing and Fangmeier, 1992). For more detailed information see the Supplementary Methods.

### **Analysis of chlorophyll content**

Chlorophyll (Chl) was extracted in 100% DMSO (dimethylsulfoxide) for 90 min (two times) at 65°C (Ronen and Galun, 1984). CaCO<sub>3</sub> was added to avoid acidification and concomitant phaeophytinization of chlorophyll. After spectrophotometric analysis the Chl<sub>a</sub> content was on the one side calculated according to Arnon *et al.* (1974) whereas the Chl<sub>a+b</sub> content was calculated according to Lange, Bilger, and Pfanz (pers. comm.) described in (Weber *et al.*, 2013) as follows:

$$\text{Chl}_a [\mu\text{g}] = [12.19 \cdot (\text{OD}_{665} - \text{OD}_{700})] \cdot a$$

$$\text{Chl}_{a+b} [\mu\text{g}] = [20.2 \cdot (\text{OD}_{648} - \text{OD}_{700}) + 8.02 \cdot (\text{OD}_{665} - \text{OD}_{700})] \cdot a [\text{ml}]$$

Where  $Chl_{a+b}$  [ $\mu\text{g}$ ],  $Chl_a$  [ $\mu\text{g}$ ]: chlorophyll content of the sample in micrograms

$E_{648}$ ,  $E_{665}$ ,  $E_{700}$ : absorption at the given wavelengths,

a: amount of DMSO [ml].

The chlorophyll content per surface area [ $\text{mg}/\text{m}^2$ ] was calculated by dividing the Chl value by the surface area of the sample (Weber *et al.*, 2013).

## **Analysis of pH**

For analysis of pH-values, 0.5 g of substrate (upper 5 mm of the crust/soil) of each type of biocrust and bare soil ( $n = 4$ ), were mixed with 1.25 ml of distilled water and shaken for 15 min. After 45 minutes of sedimentation the pH-values were determined electrometrically with the help of a glass electrode (Minitrode, Hamilton Messtechnik GmbH, Höchst, Germany).

## **CO<sub>2</sub> gas exchange measurements – Calculation of soil respiration rates**

Soil respiration rates of cyanobacteria- and lichen-dominated biocrusts were calculated by subtracting the dark respiration (DR) values of the photoautotrophic organisms from those of the complete biocrust. As the present study is focused on the effect of biocrust-defining autotrophic organisms on the heterotrophic community, we investigate the respiratory properties of the heterotrophs, whereas the NP of complete crusts is analyzed in separate publications (Weber *et al.* 2012; Tamm *et al.* in prep.).

## **Statistical Analyses**

### *Molecular analyses*

A one-way between subjects ANOVA and post hoc comparison using the Tukey's honestly significant difference (HSD) test was conducted to compare alpha diversity-related values (Observed species number, Shannon index of species diversity, Faith's Phylogenetic Diversity) and gene copy numbers between bare soil and different biocrust types (R's stats package). Where assumptions for parametric tests were not met, a Kruskal-Wallis test for independent samples and a Tukey and Kramer (Nemenyi) post hoc test were performed (R's stats package). ANOSIM was applied using the QIIME script `compare_categories.py` (R's vegan package) to test whether the grouping of samples by a given category (bare soil and biocrust type) was statistically significant. In addition, we used DESeq2, an alternative method for normalization, based on a model using negative binomial distribution, to perform analyses of differential abundance of taxa across sample types (`test="wald"` and `fitType="parametric"`). It was assumed that the abundance of an OTU differed if its mean proportion



was significantly different between two sample classes (biocrust type and/or bare soil) (Love *et al.*, 2014).

### Biomass, soil parameters and respiration

All acquired data were first tested for normality (Shapiro-Wilk test) and homogeneity of variance (Levene's test). For parametric data (i.e., Chl<sub>a</sub>, pH and total nitrogen), a one-way ANOVA with a Fisher LSD post hoc test was conducted using OriginPro b9.2.214 (OriginLab Corporation, Northampton, Massachusetts, USA; Supplementary Table S4). For non-parametric data (i.e., Chl<sub>a+b</sub> and total C), a Kruskal-Wallis test for independent samples with Fisher LSD post hoc test was applied using Statistica12 (StatSoft, Oklahoma, USA; Supplementary Table S4). Effects of temperature and biocrust type on soil respiration, transformed into the natural logarithm, were analyzed using a two way ANOVA with a Fisher LSD post hoc test (OriginLab Corporation, Northampton, Massachusetts, USA; Supplementary Table S5). A significance level of  $p \leq 0.05$  was chosen in all cas

## Supplementary Results

### Figures

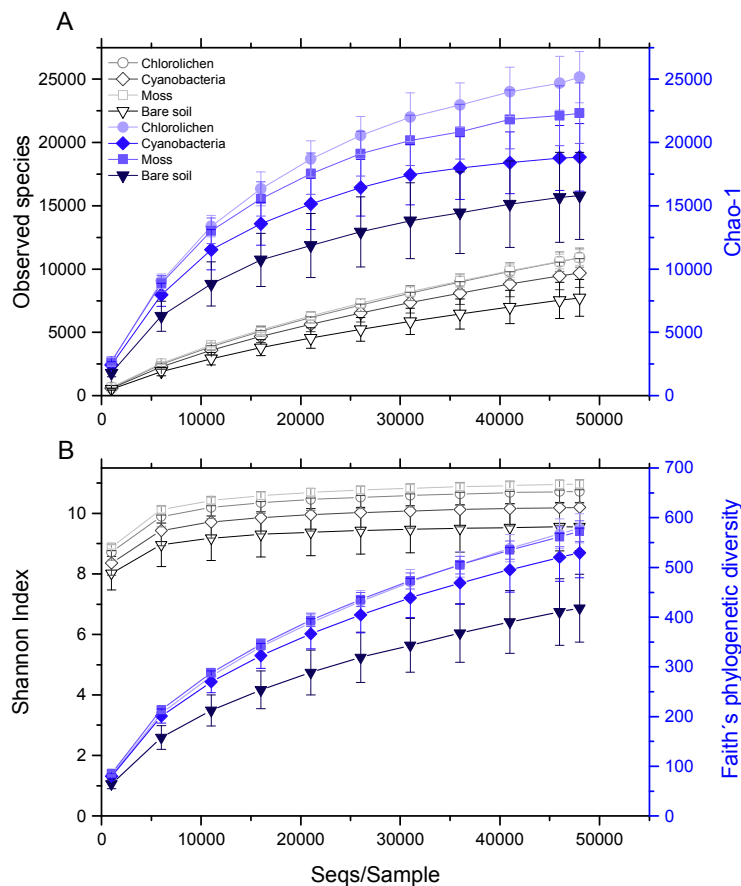

**Fig. S1** Rarefaction curves of the bacterial 16S rRNA gene data calculated at multiple sequence depths and measures of alpha diversity.

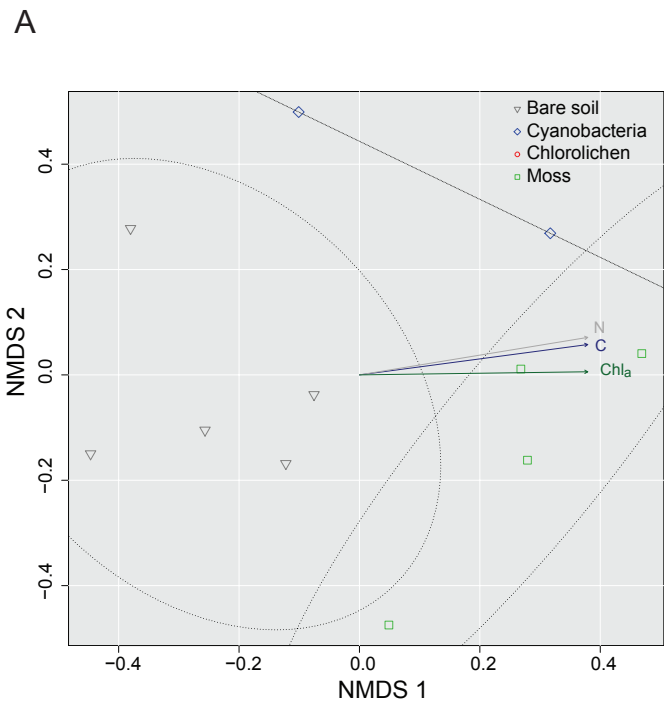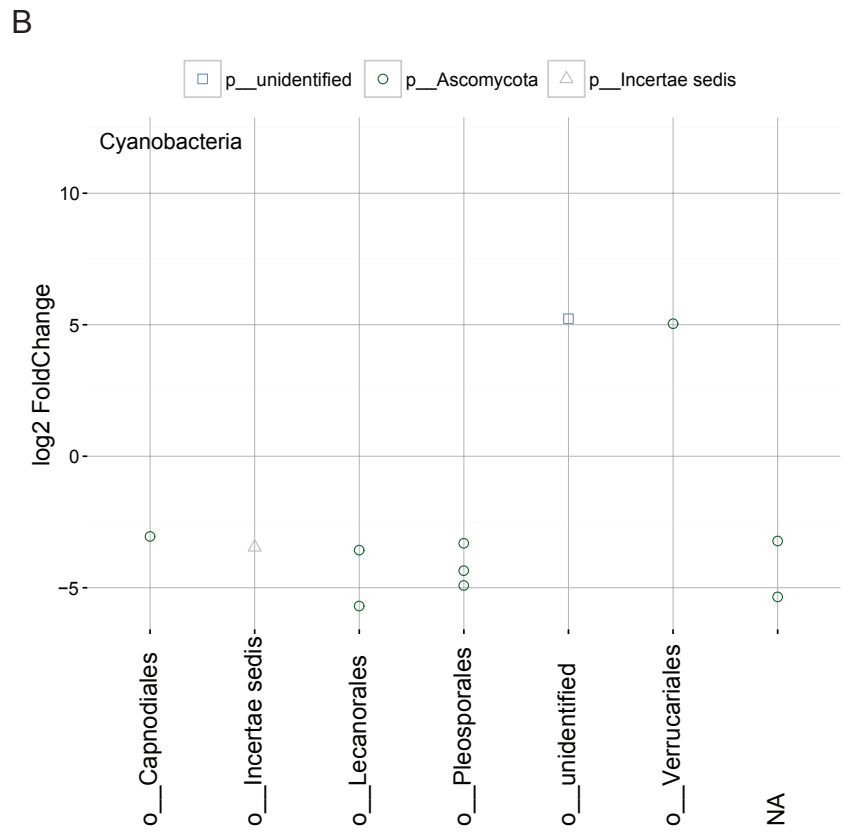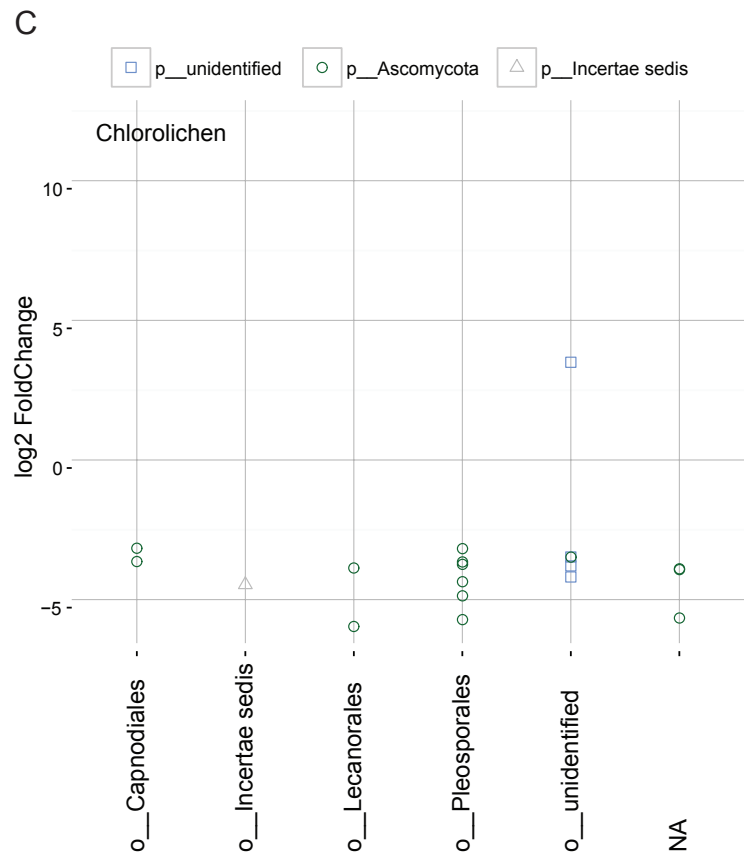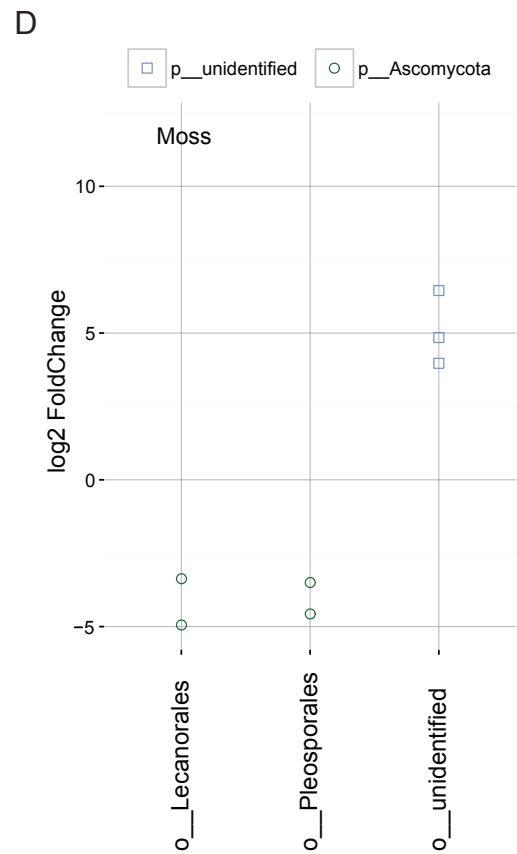

**Fig. S2 Fungal community analysis.** Ordination using Non-Metric Multidimensional Scaling (NMDS) derived from Bray-Curtis dissimilarity; based on amplicon ITS data. Samples with insufficient number of quality sequencing reads were removed. 95% confidence ellipses are shown (A). Log<sub>2</sub> Fold Change of OTUs proportions for the three biocrust types versus the bare soil (DESeq2, Benjamini-Hochberg adjusted P-value < 0.01, n=5) (B-D).

**Fig. S3 Relative abundance of bacterial OTUs at family-level in cyanobacteria-dominated (A), chlorolichen-dominated (B) and moss-dominated biocrusts (C) compared to bare soil.** Data shown as log<sub>2</sub> fold change, positive values indicate an increased presence in cyanobacteria-/chlorolichen-/moss-dominated biocrust as compared to bare soil (DESeq2, Benjamini-Hochberg adjusted P value < 0.01, n=7)

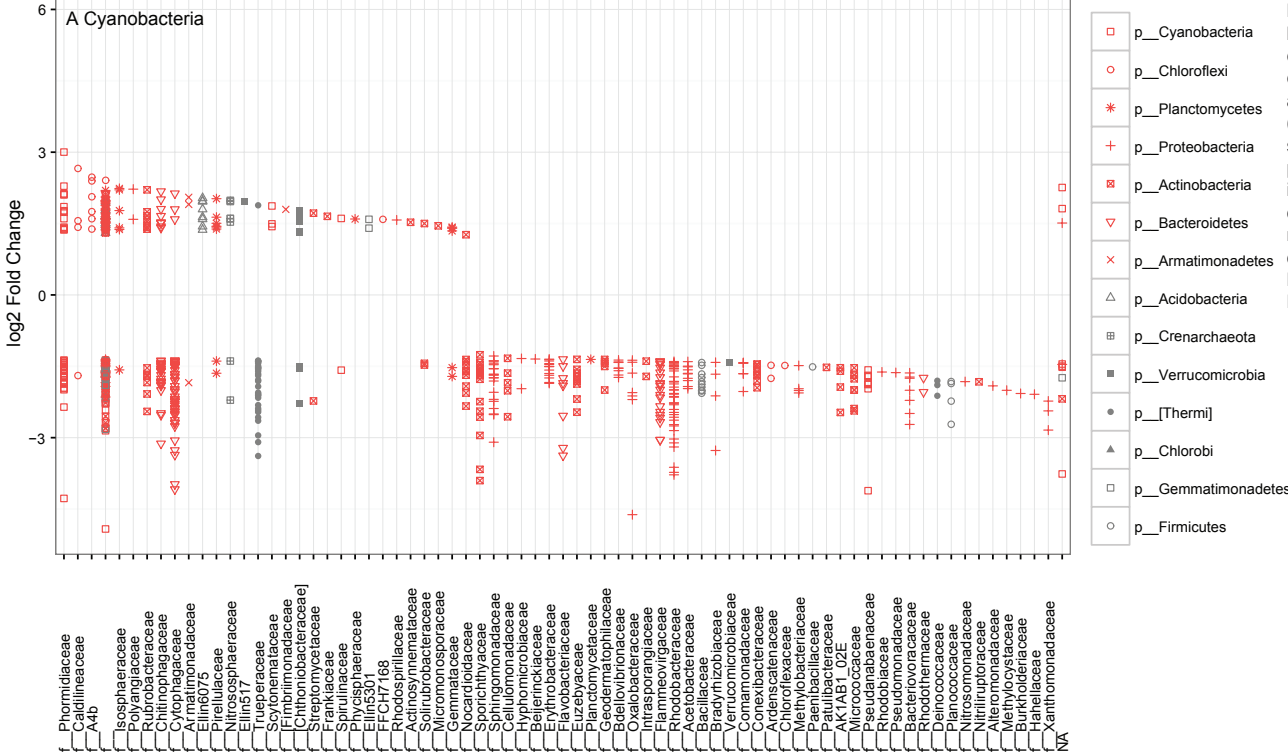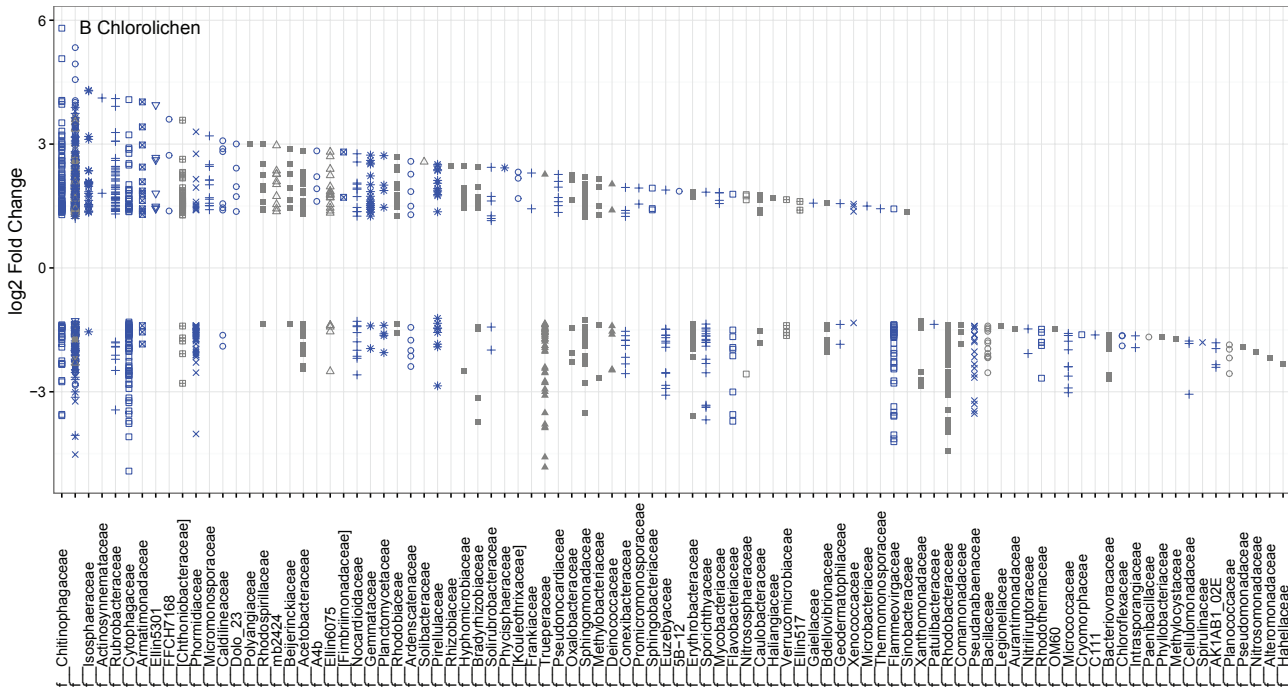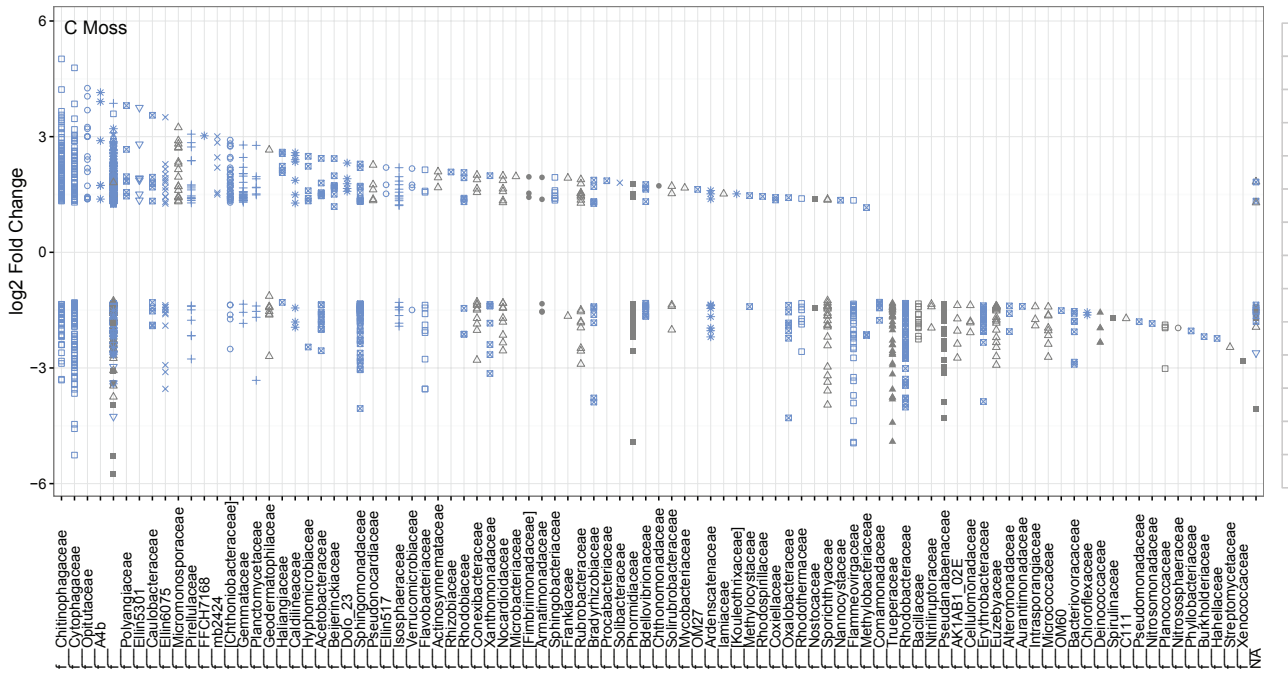

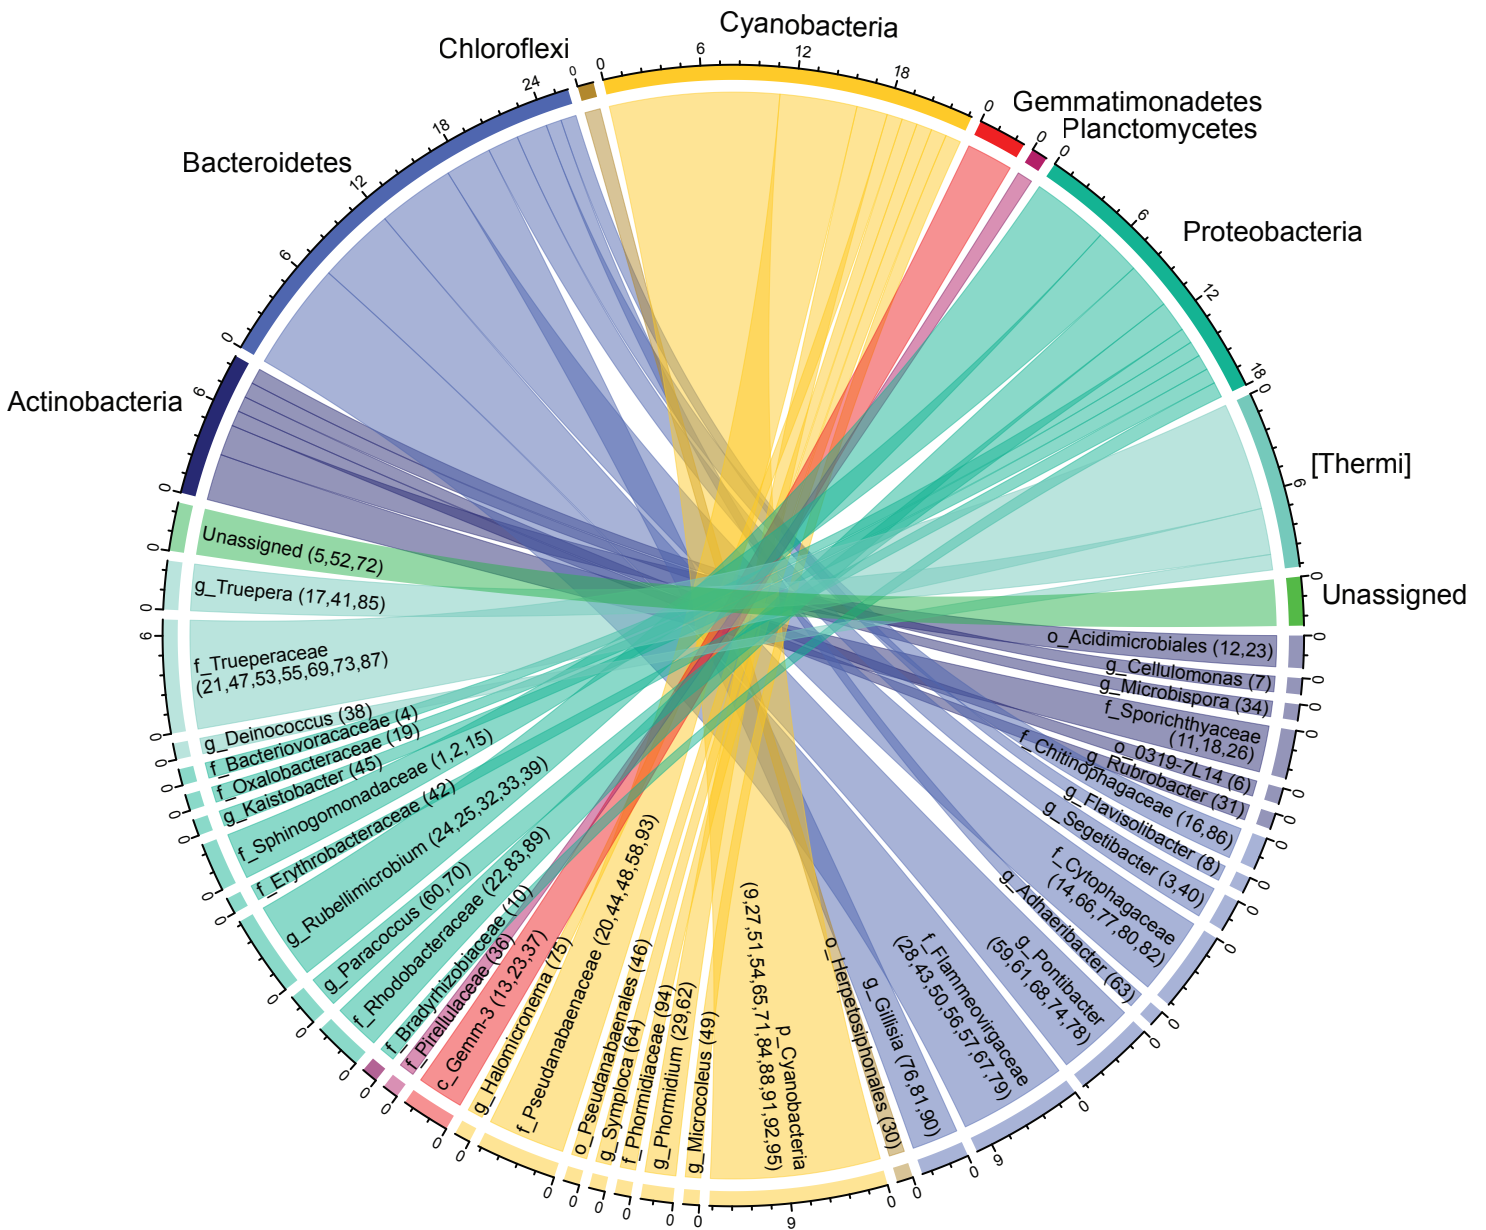

**Fig. S4 Analysis of habitat specialists and generalists.** Niche breadth ( $B$ ) of OTUs was calculated according to Levins (Levins, 1968; Logares et al., 2012). OTUs with a  $B$ -value  $< 1.5$  were considered as habitat specialists. Specialists of bare soil are shown. Numbers in brackets refer to figure 5A. Numbers outside of circles indicate the number of OTUs.

## Supplementary Tables

**Table S1** Barcode primer sequences used in this study: amplicons were sequenced from the Titanium A adaptor (CCATCTCATCCCTGCGTGTCTCCGAC), followed by a 4 bases key sequence (TCAG), the 8 bases barcode and the template specific sequence. The reverse primer was used with the Titanium B adaptor (CCTATCCCCTGTGTGCCTTGGCAGTC) and the target specific sequence but without barcode sequence (CCTATCCCCTGTGTGCCTTGGCAGTC GCTGCGTTCTTCATCGATGC).

| Barcode ID | Barcode (5' - 3') | target specific sequence |
|------------|-------------------|--------------------------|
| 1          | ACGAGTGCGT        | CTTGGTCATTTAGAGGAAGTAA   |
| 2          | ACGCTCGACA        | CTTGGTCATTTAGAGGAAGTAA   |
| 3          | AGACGCACTC        | CTTGGTCATTTAGAGGAAGTAA   |
| 4          | AGCACTGTAG        | CTTGGTCATTTAGAGGAAGTAA   |
| 5          | ATCAGACACG        | CTTGGTCATTTAGAGGAAGTAA   |
| 6          | ATATCGCGAG        | CTTGGTCATTTAGAGGAAGTAA   |
| 7          | CGTGTCTCTA        | CTTGGTCATTTAGAGGAAGTAA   |
| 8          | CTCGCGTGTG        | CTTGGTCATTTAGAGGAAGTAA   |
| 10         | TCTCTATGCG        | CTTGGTCATTTAGAGGAAGTAA   |
| 11         | TGATACGTCT        | CTTGGTCATTTAGAGGAAGTAA   |
| 13         | CATAGTAGTG        | CTTGGTCATTTAGAGGAAGTAA   |
| 14         | CGAGAGATAC        | CTTGGTCATTTAGAGGAAGTAA   |
| 15         | ATACGACGTA        | CTTGGTCATTTAGAGGAAGTAA   |
| 16         | TCACGTAATA        | CTTGGTCATTTAGAGGAAGTAA   |
| 17         | CGTCTAGTAC        | CTTGGTCATTTAGAGGAAGTAA   |
| 18         | TCTACGTAGC        | CTTGGTCATTTAGAGGAAGTAA   |
| 19         | TGTAATACTC        | CTTGGTCATTTAGAGGAAGTAA   |
| 20         | ACGACTACAG        | CTTGGTCATTTAGAGGAAGTAA   |
| 21         | CGTAGACTAG        | CTTGGTCATTTAGAGGAAGTAA   |
| 22         | TACGAGTATG        | CTTGGTCATTTAGAGGAAGTAA   |
| 23         | TACTCTCGTG        | CTTGGTCATTTAGAGGAAGTAA   |
| 24         | TAGAGACGAG        | CTTGGTCATTTAGAGGAAGTAA   |
| 25         | TCGTCGCTCG        | CTTGGTCATTTAGAGGAAGTAA   |
| 26         | ACATACGCGT        | CTTGGTCATTTAGAGGAAGTAA   |
| 27         | ACGCGAGTAT        | CTTGGTCATTTAGAGGAAGTAA   |
| 28         | ACTACTATGT        | CTTGGTCATTTAGAGGAAGTAA   |
| 29         | ACTGTACAGT        | CTTGGTCATTTAGAGGAAGTAA   |
| 30         | AGACTATACT        | CTTGGTCATTTAGAGGAAGTAA   |
| 31         | AGCGTCGTCT        | CTTGGTCATTTAGAGGAAGTAA   |
| 32         | AGTACGCTAT        | CTTGGTCATTTAGAGGAAGTAA   |

**Table S2** Correlation between soil parameters and NMDS axes

| <b>Bacteria</b>          | <b>r(Axis 1)</b> | <b>r(Axis 2)</b> | <b>R<sup>2</sup></b> | <b>P</b> |
|--------------------------|------------------|------------------|----------------------|----------|
| <b>total Carbon</b>      | -0.998           | -0.058           | 0.349                | 0.004    |
| <b>total Nitrogen</b>    | -0.953           | -0.303           | 0.356                | 0.001    |
| <b>pH</b>                | -0.456           | 0.890            | 0.021                | 0.886    |
| <b>Chl<sub>a+b</sub></b> | -0.981           | -0.195           | 0.578                | 0.001    |
| <b>Chl<sub>a</sub></b>   | -0.849           | -0.528           | 0.5575               | 0.003    |
| <b>Fungi</b>             | <b>r(Axis 1)</b> | <b>r(Axis 2)</b> | <b>R<sup>2</sup></b> | <b>P</b> |
| <b>total Carbon</b>      | 0.989            | 0.150            | 0.623                | 0.023    |
| <b>total Nitrogen</b>    | 0.983            | 0.185            | 0.556                | 0.031    |
| <b>pH</b>                | 0.983            | -0.181           | 0.028                | 0.912    |
| <b>Chl<sub>a+b</sub></b> | 0.987            | 0.163            | 0.548                | 0.060    |
| <b>Chl<sub>a</sub></b>   | 1.00             | 0.016            | 0.571                | 0.042    |

**Table S3** Comparison of relative abundances of bacterial taxa in chlorolichen-, cyanobacteria-, moss-dominated biocrust and bare soil.

| <b>Crenarchaeota</b>   | <b>Moss</b>                      | <b>Chlorolichen</b>              | <b>Cyanobacteria</b>            |
|------------------------|----------------------------------|----------------------------------|---------------------------------|
| <b>Bare soil</b>       | P=8.10e-1<br>(Tukey's HSD test)  | P=8.72e-2<br>(Tukey's HSD test)  | P=4.00e-5<br>(Tukey's HSD test) |
| <b>Cyanobacteria</b>   | P=4.10 e-4<br>(Tukey's HSD test) | P=2.01e-2<br>(Tukey's HSD test)  |                                 |
| <b>Chlorolichen</b>    | P=3.98e-1<br>(Tukey's HSD test)  |                                  |                                 |
| <b>Acidobacteria</b>   | <b>Moss</b>                      | <b>Chlorolichen</b>              | <b>Cyanobacteria</b>            |
| <b>Bare soil</b>       | P =3.00e-5<br>(Tukey's HSD test) | P= 1.40e-4<br>(Tukey's HSD test) | P=1.70e-6<br>(Tukey's HSD test) |
| <b>Cyanobacteria</b>   | P=6.16e-1<br>(Tukey's HSD test)  | P=2.94e-1<br>(Tukey's HSD test)  |                                 |
| <b>Chlorolichen</b>    | P=9.37e-1<br>(Tukey's HSD test)  |                                  |                                 |
| <b>Actinobacteria</b>  | <b>Moss</b>                      | <b>Chlorolichen</b>              | <b>Cyanobacteria</b>            |
| <b>Bare soil</b>       | P=1<br>(Nemenyi-Test)            | P=2.90e-2<br>(Nemenyi-Test)      | P=9.99e-1<br>(Nemenyi-Test)     |
| <b>Cyanobacteria</b>   | P=9.96e-1<br>(Nemenyi-Test)      | P=4.20e-2<br>(Nemenyi-Test)      |                                 |
| <b>Chlorolichen</b>    | P= 2.20e-2<br>(Nemenyi-Test)     |                                  |                                 |
| <b>Armatimonadetes</b> | <b>Moss</b>                      | <b>Chlorolichen</b>              | <b>Cyanobacteria</b>            |
| <b>Bare soil</b>       | P=1.17e-1<br>(Nemenyi-Test)      | P=2.00e-3<br>(Nemenyi-Test)      | P=5.70e-3<br>(Nemenyi-Test)     |
| <b>Cyanobacteria</b>   | P=6.05e-1<br>(Nemenyi-Test)      | P=9.91e-1<br>(Nemenyi-Test)      |                                 |
| <b>Chlorolichen</b>    | P=4.21e-1<br>(Nemenyi-Test)      |                                  |                                 |
| <b>Bacteroidetes</b>   | <b>Moss</b>                      | <b>Chlorolichen</b>              | <b>Cyanobacteria</b>            |
| <b>Bare soil</b>       | P=9.37e-1<br>(Nemenyi-Test)      | P=1.95e-1<br>(Nemenyi-Test)      | P=1.10e-3<br>(Nemenyi-Test)     |
| <b>Cyanobacteria</b>   | P=8.80e-3<br>(Nemenyi-Test)      | P=2.96e-1<br>(Nemenyi-Test)      |                                 |
| <b>Chlorolichen</b>    | P=5.01e-1<br>(Nemenyi-Test)      |                                  |                                 |
| <b>Chloroflexi</b>     | <b>Moss</b>                      | <b>Chlorolichen</b>              | <b>Cyanobacteria</b>            |
| <b>Bare soil</b>       | P<1.00e-5<br>(Tukey's HSD test)  | P<1.00e-5<br>(Tukey's HSD test)  | P<1.00e-5<br>(Tukey's HSD test) |
| <b>Cyanobacteria</b>   | P=9.46e-1<br>(Tukey's HSD test)  | P=2.77e-2<br>(Tukey's HSD test)  |                                 |
| <b>Chlorolichen</b>    | P=8.92e-1<br>(Tukey's HSD test)  |                                  |                                 |
| <b>Cyanobacteria</b>   | <b>Moss</b>                      | <b>Chlorolichen</b>              | <b>Cyanobacteria</b>            |
| <b>Bare soil</b>       | P=1.60e-2<br>(Nemenyi-Test)      | P=1.95e-1<br>(Nemenyi-Test)      | P=1.00e+0<br>(Nemenyi-Test)     |
| <b>Cyanobacteria</b>   | P=2.00e-2<br>(Nemenyi-Test)      | P=2.21e-1<br>(Nemenyi-Test)      |                                 |
| <b>Chlorolichen</b>    | P=7.64e-1<br>(Nemenyi-Test)      |                                  |                                 |

**Table S3** Continued

| <b>Gemmatimonadetes</b>    | <b>Moss</b>                     | <b>Chlorolichen</b>             | <b>Cyanobacteria</b>            |
|----------------------------|---------------------------------|---------------------------------|---------------------------------|
| <b>Bare soil</b>           | P=1.60e-3<br>(Tukey's HSD test) | P=1.89e-2<br>(Tukey's HSD test) | P=1.20e-3<br>(Tukey's HSD test) |
| <b>Cyanobacteria</b>       | P=7.27e-1<br>(Tukey's HSD test) | P=1.92e-1<br>(Tukey's HSD test) |                                 |
| <b>Chlorolichen</b>        | P=7.36e-1<br>(Tukey's HSD test) |                                 |                                 |
| <b>Planctomycetes</b>      | <b>Moss</b>                     | <b>Chlorolichen</b>             | <b>Cyanobacteria</b>            |
| <b>Bare soil</b>           | P<1.00e-5<br>(Tukey's HSD test) | P=1.00e-5<br>(Tukey's HSD test) | P=1.00e-4<br>(Tukey's HSD test) |
| <b>Cyanobacteria</b>       | P=4.35e-3<br>(Tukey's HSD test) | P=1.00e-1<br>(Tukey's HSD test) |                                 |
| <b>Chlorolichen</b>        | P=4.52e-3<br>(Tukey's HSD test) |                                 |                                 |
| <b>Alphaproteobacteria</b> | <b>Moss</b>                     | <b>Chlorolichen</b>             | <b>Cyanobacteria</b>            |
| <b>Bare soil</b>           | P=1.74e-1<br>(Tukey's HSD test) | P=2.11e-1<br>(Tukey's HSD test) | P=1.61e-3<br>(Tukey's HSD test) |
| <b>Cyanobacteria</b>       | P=1.84e-1<br>(Tukey's HSD test) | P=1.15e-1<br>(Tukey's HSD test) |                                 |
| <b>Chlorolichen</b>        | P=1.00e+0<br>(Tukey's HSD test) |                                 |                                 |
| <b>Deltaproteobacteria</b> | <b>Moss</b>                     | <b>Chlorolichen</b>             | <b>Cyanobacteria</b>            |
| <b>Bare soil</b>           | P=1.60e-1<br>(Nemenyi-Test)     | P=4.41e-1<br>(Nemenyi-Test)     | P=9.80e-1<br>(Nemenyi-Test)     |
| <b>Cyanobacteria</b>       | P=6.50e-2<br>(Nemenyi-Test)     | P=6.87e-1<br>(Nemenyi-Test)     |                                 |
| <b>Chlorolichen</b>        | P=2.00e-3<br>(Nemenyi-Test)     |                                 |                                 |
| <b>Verrucomicrobia</b>     | <b>Moss</b>                     | <b>Chlorolichen</b>             | <b>Cyanobacteria</b>            |
| <b>Bare soil</b>           | P<1.00e-5<br>(Tukey's HSD test) | P=8.60e-4<br>(Tukey's HSD test) | P<1.00e-5<br>(Tukey's HSD test) |
| <b>Cyanobacteria</b>       | P=5.67e-2<br>(Tukey's HSD test) | P=1.67e-1<br>(Tukey's HSD test) |                                 |
| <b>Chlorolichen</b>        | P=3.40e-4<br>(Tukey's HSD test) |                                 |                                 |
| <b>[Thermi]</b>            | <b>Moss</b>                     | <b>Chlorolichen</b>             | <b>Cyanobacteria</b>            |
| <b>Bare soil</b>           | P<1.00e-5<br>(Tukey's HSD test) | P<1.00e-5<br>(Tukey's HSD test) | P=5.00e-4<br>(Tukey's HSD test) |
| <b>Cyanobacteria</b>       | P=3.98e-1<br>(Tukey's HSD test) | P=7.13e-1<br>(Tukey's HSD test) |                                 |
| <b>Chlorolichen</b>        | P=9.50e-1<br>(Tukey's HSD test) |                                 |                                 |



**Table S4** Comparison of soil parameters across chlorolichen-, cyanobacteria-, moss-dominated biocrust and bare soil. Fisher Test (Fisher LSD) adjusted P-values for all pairwise comparisons between chlorolichen, cyanobacteria, moss and bare soil samples.

| Total carbon         | Moss                             | Chlorolichen                    | Cyanobacteria                   |
|----------------------|----------------------------------|---------------------------------|---------------------------------|
| <b>Bare soil</b>     | P=4.18e-7<br>(Fisher LSD test)   | P=5.81e-2<br>(Fisher LSD test)  | P=1.24e-1<br>(Fisher LSD test)  |
| <b>Cyanobacteria</b> | P=8.60e-5<br>(Fisher LSD test)   | P=7.08e-1<br>(Fisher LSD test)  |                                 |
| <b>Chlorolichen</b>  | P=2.87e-4<br>(Fisher LSD test)   |                                 |                                 |
| Total nitrogen       | Moss                             | Chlorolichen                    | Cyanobacteria                   |
| <b>Bare soil</b>     | P =4.28e-11<br>(Fisher LSD test) | P= 4.66e-4<br>(Fisher LSD test) | P=4.08e-3<br>(Fisher LSD test)  |
| <b>Cyanobacteria</b> | P= 1.68e-6<br>(Fisher LSD test)  | P=4.63e-1<br>(Fisher LSD test)  |                                 |
| <b>Chlorolichen</b>  | P= 2.10e-5<br>(Fisher LSD test)  |                                 |                                 |
| pH                   | Moss                             | Chlorolichen                    | Cyanobacteria                   |
| <b>Bare soil</b>     | P=9.12e-2<br>(Fisher LSD test)   | P=6.53e-1<br>(Fisher LSD test)  | P=5.20e-1<br>(Fisher LSD test)  |
| <b>Cyanobacteria</b> | P=2.63e-1<br>(Fisher LSD test)   | P=2.83e-1<br>(Fisher LSD test)  |                                 |
| <b>Chlorolichen</b>  | P=4.04e-2<br>(Fisher LSD test)   |                                 |                                 |
| Chl <sub>a+b</sub>   | Moss                             | Chlorolichen                    | Cyanobacteria                   |
| <b>Bare soil</b>     | P=4.76e-8<br>(Fisher LSD test)   | P= 5.50e-4<br>(Fisher LSD test) | P= 5.24e-5<br>(Fisher LSD test) |
| <b>Cyanobacteria</b> | P= 7.54e-4<br>(Fisher LSD test)  | P=2.63e-1<br>(Fisher LSD test)  |                                 |
| <b>Chlorolichen</b>  | P= 7.05e-5<br>(Fisher LSD test)  |                                 |                                 |
| Chl <sub>a</sub>     | Moss                             | Chlorolichen                    | Cyanobacteria                   |
| <b>Bare soil</b>     | P=2.62e-8<br>(Fisher LSD test)   | P=3.26e-3<br>(Fisher LSD test)  | P= 5.49e-4<br>(Fisher LSD test) |
| <b>Cyanobacteria</b> | P=3.08e-5<br>(Fisher LSD test)   | P=4.18e-1<br>(Fisher LSD test)  |                                 |
| <b>Chlorolichen</b>  | P=6.52e-6<br>(Fisher LSD test)   |                                 |                                 |

**Table S5** Comparison of soil respiration across chlorolichen-, cyanobacteria-, and moss-dominated biocrust. Fisher Test (Fisher LSD) adjusted *p*-values for all pairwise comparisons between chlorolichen, cyanobacteria, moss and bare soil samples.

| Soil respiration     | Moss                            | Chlorolichen                   |
|----------------------|---------------------------------|--------------------------------|
| <b>Cyanobacteria</b> | P=8.00 e-6<br>(Fisher LSD test) | P=4.90e-1<br>(Fisher LSD test) |
| <b>Chlorolichen</b>  | P=8.53 e-7<br>(Fisher LSD test) |                                |

## References

- Arnon DI, McSwain BD, Tsujimoto HY, Wada K. (1974). Photochemical activity and components of membrane preparations from blue-green algae. I. Coexistence of two photosystems in relation to chlorophyll a and removal of phycocyanin. *Biochim Biophys Acta - Bioenerg* **357**: 231–245.
- Bates ST, Cropsey GWG, Caporaso JG, Knight R, Fierer N. (2011). Bacterial communities associated with the lichen symbiosis. *Appl Environ Microbiol* **77**: 1309–1314.
- Belnap J, Büdel B, Lange OL. (2003). Biological Soil Crusts: Characteristics and Distribution. In: Belnap J, Lange OL (eds). *Biological Soil Crusts: Structure, Function, and Management*. Springer Berlin Heidelberg: Berlin, Heidelberg, pp 3–30.
- Bengtsson-Palme J, Ryberg M, Hartmann M, Branco S, Wang Z, Godhe A, *et al.* (2013). Improved software detection and extraction of ITS1 and ITS2 from ribosomal ITS sequences of fungi and other eukaryotes for analysis of environmental sequencing data. *Methods Ecol Evol* **4**: 914–919.
- Büdel B, Darienko T, Deutschewitz K, Dojani S, Friedl T, Mohr KI, *et al.* (2009). Southern african biological soil crusts are ubiquitous and highly diverse in drylands, being restricted by rainfall frequency. *Microb Ecol* **57**: 229–247.
- Caporaso JG, Bittinger K, Bushman FD, Desantis TZ, Andersen GL, Knight R. (2010). PyNAST: A flexible tool for aligning sequences to a template alignment. *Bioinformatics* **26**: 266–267.
- Caporaso JG, Kuczynski J, Stombaugh J, Bittinger K, Bushman FD, Costello EK, *et al.* (2011). QIIME allows analysis of high-throughput community sequencing data. *Nat Methods* **7**: 335–336.
- Dojani S, Büdel B, Deutschewitz K, Weber B. (2011). Rapid succession of Biological Soil Crusts after experimental disturbance in the Succulent Karoo, South Africa. *Appl Soil Ecol* **48**: 263–269.
- Dojani S, Kauff F, Weber B, Büdel B. (2014). Genotypic and Phenotypic Diversity of Cyanobacteria in Biological Soil Crusts of the Succulent Karoo and Nama Karoo of Southern Africa. *Microb Ecol* **67**: 286–301.
- Edgar RC. (2010). Search and clustering orders of magnitude faster than BLAST. *Bioinformatics* **26**: 2460–2461.
- Eldridge D, Tozer ME. (1997). *A Practical Guide to Soil Lichens and Bryophytes of Australia's Dry Country*. Sydney.
- Faith DP. (1992). Conservation evaluation and phylogenetic diversity. *Biol Conserv* **61**: 1–10.
- Haarmeyer D, Luther-Mosebach J, Dengler J, Schmiedel U, Finck M, Berger K, *et al.* (2010). Biodiversity in southern Africa. Volume 1: Patterns at local scale – the BIOTA Observatories. 1st ed. Klaus Hess Publishers: Göttingen & Windhoek.
- Van Jaarsveld E. (1987). The Succulent riches of South Africa and Namibia. *ALOE* **24**: 45–92.
- Kozich JJ, Westcott SL, Baxter NT, Highlander SK, Schloss PD. (2013). Development of a dual-index sequencing strategy and curation pipeline for analyzing amplicon sequence data on the miseq illumina sequencing platform. *Appl Environ Microbiol* **79**: 5112–5120.
- Levins R. (1968). *Evolution in changing environments*. Princeton University Press: Princeton, New Jersey.
- Li K, Bihan M, Methé BA. (2013). Analyses of the Stability and Core Taxonomic Membership of the Human Microbiome. *PLoS One* **8**.
- Logares R, Lindström M ES, Langenheder S, Rg J, Logue B, Paterson H, *et al.* (2012). Biogeography of bacterial communities exposed to progressive long-term environmental change. *ISME J* **7**: 937–948.
- Love MI, Huber W, Anders S. (2014). Moderated estimation of fold change and dispersion for RNA-seq data with DESeq2.
- Lozupone C, Knight R. (2005). UniFrac: a New Phylogenetic Method for Comparing Microbial Communities. *Appl Environ Microbiol* **71**: 8228–8235.
- Lozupone C, Lladser ME, Knights D, Stombaugh J, Knight R. (2011). UniFrac: an effective distance metric for

- microbial community comparison. *ISME J* **5**: 169–172.
- Magoč T, Salzberg SL. (2011). FLASH: fast length adjustment of short reads to improve genome assemblies. *Bioinformatics* **27**: 2957–63.
- McMurdie PJ, Holmes S. (2013). Phyloseq: An R Package for Reproducible Interactive Analysis and Graphics of Microbiome Census Data. *PLoS One* **8**. e-pub ahead of print, doi: 10.1371/journal.pone.0061217.
- Oksanen J. (2015). Multivariate Analysis of Ecological Communities in R : vegan tutorial.
- Price MN, Dehal PS, Arkin AP. (2009). Fasttree: Computing large minimum evolution trees with profiles instead of a distance matrix. *Mol Biol Evol* **26**: 1641–1650.
- R Core Team. (2013). R: A language and environment for statistical computing.
- Ronen R, Galun M. (1984). Pigment extraction from lichens with dimethyl sulfoxide (DMSO) and estimation of chlorophyll degradation. *Environ Exp Bot* **24**: 239–245.
- La Rosa PS, Brooks JP, Deych E, Boone EL, Edwards DJ, Wang Q, *et al.* (2012). Hypothesis testing and power calculations for taxonomic-based human microbiome data. *PLoS One* **7**: e52078.
- Rosentreter R, Bowker M, Belnap J. (2007). A field guide to biological soil crusts of Western US drylands. Denver.
- Streubing L, Fangmeier A. (1992). Abiotische Faktoren: Methoden zur ökologischen Bewertung von Böden, Klima und Immissionen. In: *Pflanzenökologisches Praktikum: Gelände- und Laborpraktikum der terrestrischen Pflanzenökologie*. Verlag Eugen Ulmer Stuttgart, pp 16–51.
- Weber B, Graf T, Bass M. (2012). Ecophysiological analysis of moss-dominated biological soil crusts and their separate components from the Succulent Karoo, South Africa. *Planta* **236**: 129–139.
- Weber B, Wessels DCJ, Deutschewitz K, Dojani S, Reichenberger H, Büdel B. (2013). Ecological characterization of soil-inhabiting and hypolithic soil crusts within the Knersvlakte, South Africa. *Ecol Process* **2**: 8.
- Weber B, Wu D, Tamm A, Ruckteschler N, Rodríguez-Caballero E, Steinkamp J, *et al.* (2015). Biological soil crusts accelerate the nitrogen cycle through large NO and HONO emissions in drylands. *Proc Natl Acad Sci U S A* **112**: 15384–9.
